# Supplementary material for: Reverse-biomineralization assembly of acid-sensitive biomimetic fibers for hard tissue engineering and drug delivery
Source: Royal Society of Chemistry journal article supplement (doi:10.1039/c3tb20274g), 2013-01-01
Supplement: c3tb20274g.pdf [file c3tb20274g.pdf]

## Electronic Supplementary Information

# Reverse-Biomineralization Assembly of Acid-Sensitive Biomimetic Fibers for Hard Tissue Engineering and Drug Delivery

Chengfang Tan,<sup>a</sup> Zhihui Sun,<sup>b</sup> Youliang Hong,<sup>\*a</sup> Yanyan Li,<sup>b</sup> Xuesi Chen<sup>\*c</sup> and Xingdong Zhang<sup>a</sup>

<sup>a</sup> National Engineering Research Center for Biomaterials, Sichuan University, Chengdu, 610064, P. R. China.

Fax: +86-28-85410246; Tel: +86-28-85410793; E-mail: hyl@scu.edu.cn

<sup>b</sup> Department of Pharmacy of the First Hospital, Jilin University, 130012, Changchun, P. R. China

<sup>c</sup> State Key Laboratory of Polymer Ecomaterials, Changchun Institute of Applied Chemistry, Chinese Academy of Sciences, Changchun, 130022, P. R. China, E-mail: xschen@ciac.jl.cn

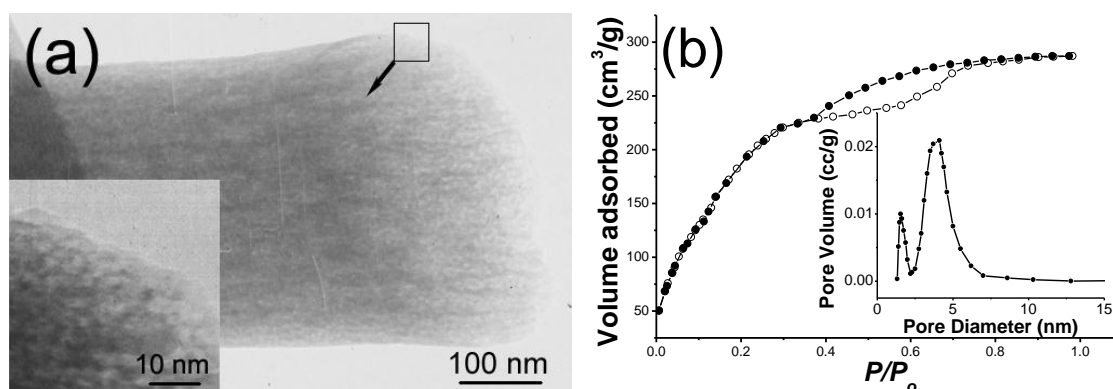

**Figure S1.** (a) TEM image and (b) N<sub>2</sub> adsorption-desorption curve and pore size distribution of small-pore BGF. The inserted in (a) is the locally magnified TEM image.
